# Supplementary material for: Sensitive Detection of Various Forms of Hydrogen Sulfide via Highly Selective Naphthalimide-Based Fluorescent Probe
Source: MDPI journal article supplement (doi:10.3390/molecules28176299), 2023-08-28
Supplement: s1 [file s1]

# Supplementary Materials

## Sensitive Detection of Various Forms of Hydrogen Sulfide by Highly Selective Naphthalimide-Based Fluorescent Probe

Daniel Słowiński <sup>1</sup>, Małgorzata Świerczyńska <sup>1</sup>, Jarosław Romański <sup>2</sup> and Radosław Podsiadły <sup>1,\*</sup>

<sup>1</sup> Institute of Polymer and Dye Technology, Faculty of Chemistry, Lodz University of Technology, Stefanowskiego 16, 90-537 Lodz, Poland; daniel.slowinski@dokt.p.lodz.pl (D.S.); malgorzata.swierczynska@dokt.p.lodz.pl (M.Ś.)

<sup>2</sup> Department of Organic and Applied Chemistry, Faculty of Chemistry, University of Lodz, Tamka 12, 91-403 Lodz, Poland; jaroslaw.romanski@chemia.uni.lodz.pl

\* Correspondence: radoslaw.podsiadly@p.lodz.pl

**Table S1.** Comparison of NAP-Py-N<sub>3</sub> with the fluorescent probes previously reported.

| Structures                                                                                                  | Medium                        | $\phi_{\text{probe}}$ | $\lambda_{\text{em}}$<br>(nm) | $\lambda_{\text{ex}}$<br>(nm) | $k_2$ (M <sup>-1</sup> s <sup>-1</sup> ) | LOD<br>(nM) | Ref.     |
|-------------------------------------------------------------------------------------------------------------|-------------------------------|-----------------------|-------------------------------|-------------------------------|------------------------------------------|-------------|----------|
| 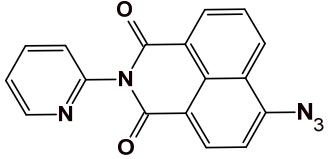<br>NAP-Py-N <sub>3</sub> | PB:DMSO<br>(9:1, v/v)         | 0.003                 | 553                           | 435                           | 9.62                                     | 15.5        | Our work |
| <br>SicAz2               | PBS:MeCN<br>(7:3, v/v)        | 0.002                 | 515                           | 404                           | ND*                                      | 300         | [S1]     |
|                          | PBS buffer<br>(20 mM, pH 7.4) | 0.0250                | 565                           | 530                           | 1.60                                     | 120         | [S2]     |

| probe 1                                                                                                            |                                                |       |     |     |      |     |      |
|--------------------------------------------------------------------------------------------------------------------|------------------------------------------------|-------|-----|-----|------|-----|------|
| 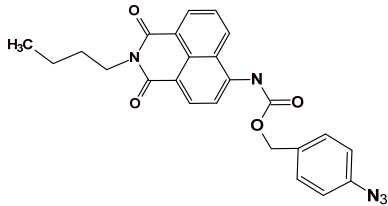 <p><b>NAP-1</b></p>              | PBS:MeCN<br>(19:1, <i>v/v</i> )                | 0.11  | 541 | 415 | 5.0  | 110 | [S3] |
|  <p><b>7b</b></p>                 | PBS:DMF<br>(9:1, <i>v/v</i> )                  | 0.012 | 450 | 350 | 4.16 | 610 | [S4] |
|  <p><b>LR-H<sub>2</sub>S</b></p> | PBS:MeCN<br>(4:1, <i>v/v</i> )                 | 0.12  | 541 | 410 | ND*  | 700 | [S5] |
|  <p><b>1</b></p>                | H <sub>2</sub> O:acetone<br>(7:3, <i>v/v</i> ) | 0.56  | 478 | 410 | ND*  | 220 | [S6] |
|                                 | 50 mM PIPES buffer,<br>100 mM KCl, pH 7.4      | <0.01 | 516 | 476 | ND*  | 86  | [S7] |

|                                                                                            |                                             |     |     |     |      |      |
|--------------------------------------------------------------------------------------------|---------------------------------------------|-----|-----|-----|------|------|
| MeRho-Az                                                                                   |                                             |     |     |     |      |      |
| 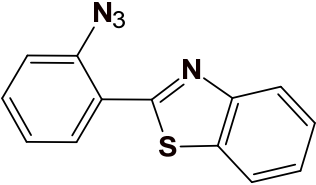 <p>1</p> | PBS buffer<br>(10 mM, pH 7.4,<br>1 mM CTAB) |     |     |     |      |      |
|                                                                                            | 0.0064                                      | 450 | 375 | ND* | 0.78 | [S8] |
|  <p>CA</p> | MeCN:H <sub>2</sub> O<br>(3:7, v/v)         |     |     |     |      |      |
|                                                                                            | 422                                         |     | 360 | ND* | 3.5  | [S9] |

\*ND-no determined

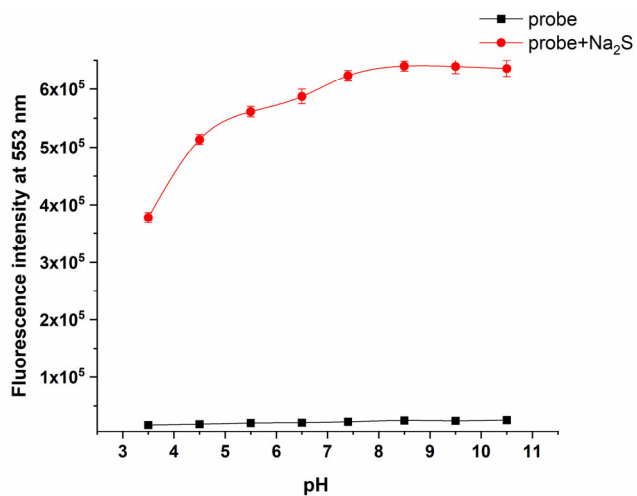

**Figure S1.** The fluorescence intensity of **NAP-Py-N<sub>3</sub>** (7.5  $\mu$ M) in the absence and presence of Na<sub>2</sub>S (37.5 $\mu$ M) in different pH buffer solutions (excitation is 435 nm, slites 1.5/1.5 nm). Data are shown as mean  $\pm$  standard deviation of three independent experiments.

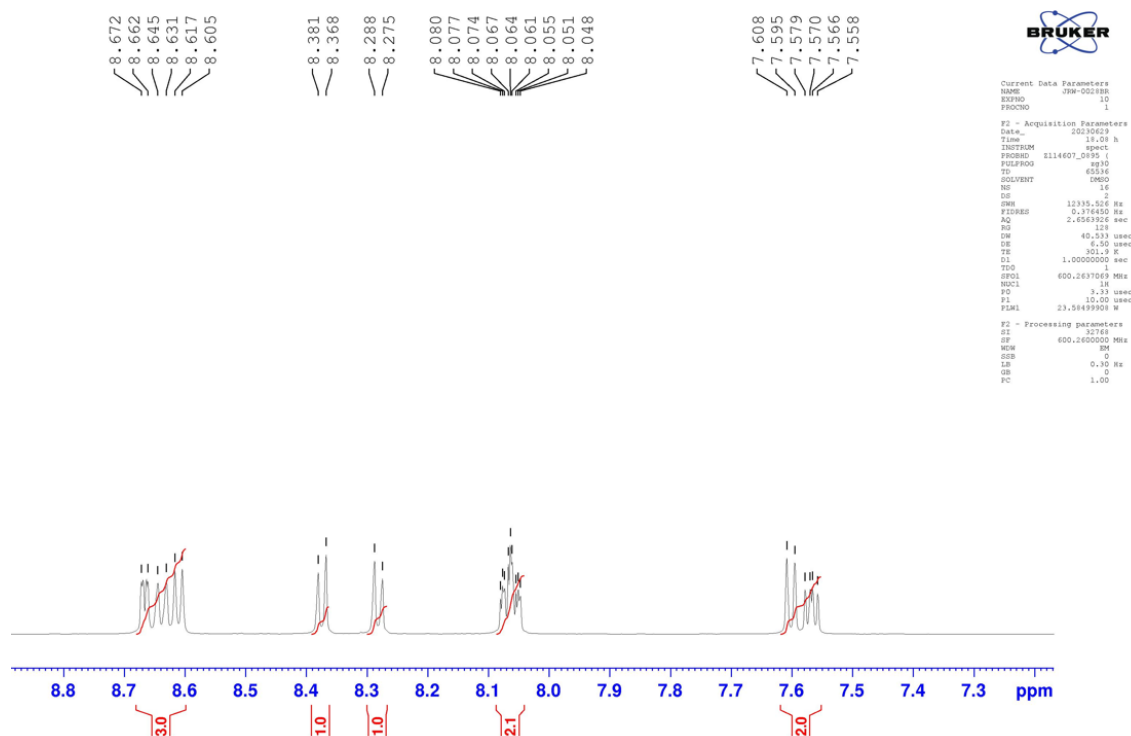

Figure S2.  $^1\text{H}$ -NMR spectra of NAP-Py-Br

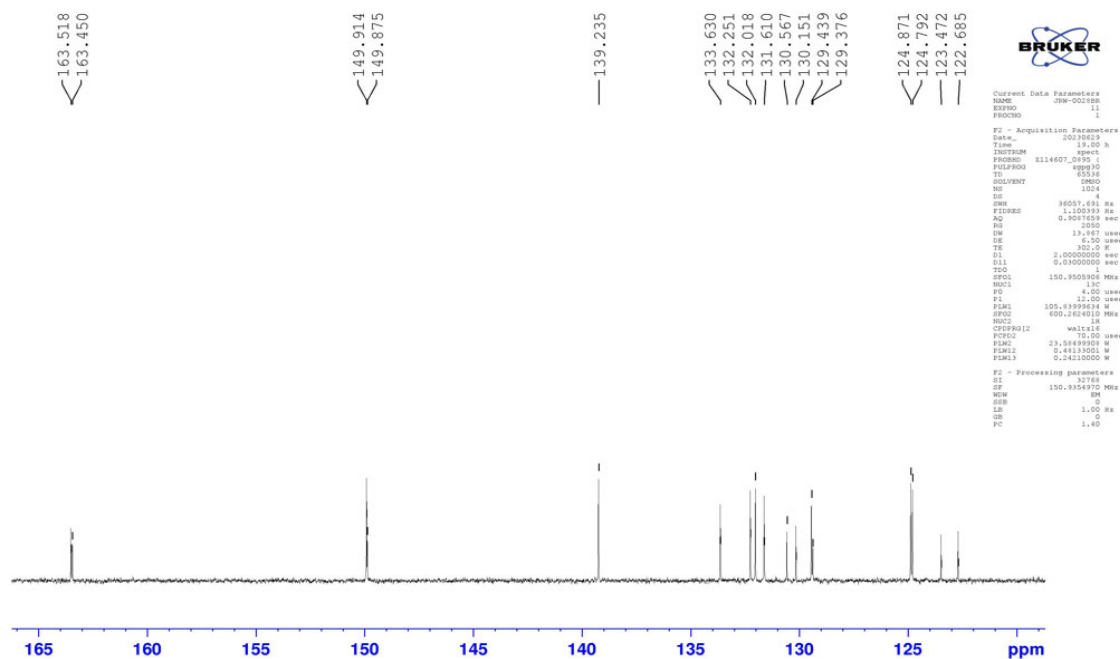

Figure S3.  $^{13}\text{C}$ -NMR spectra of NAP-Py-Br

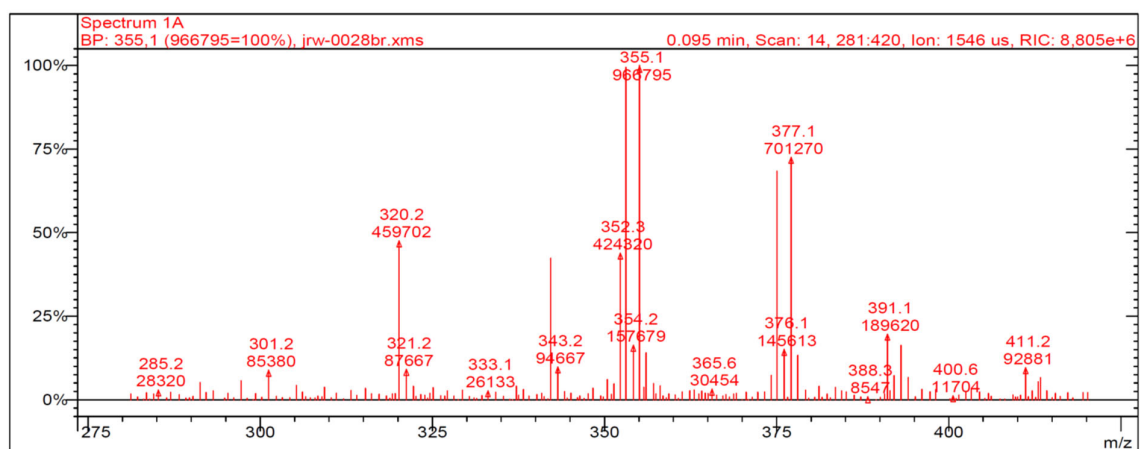

Figure S4. ESI-MS spectra of NAP-Py-Br

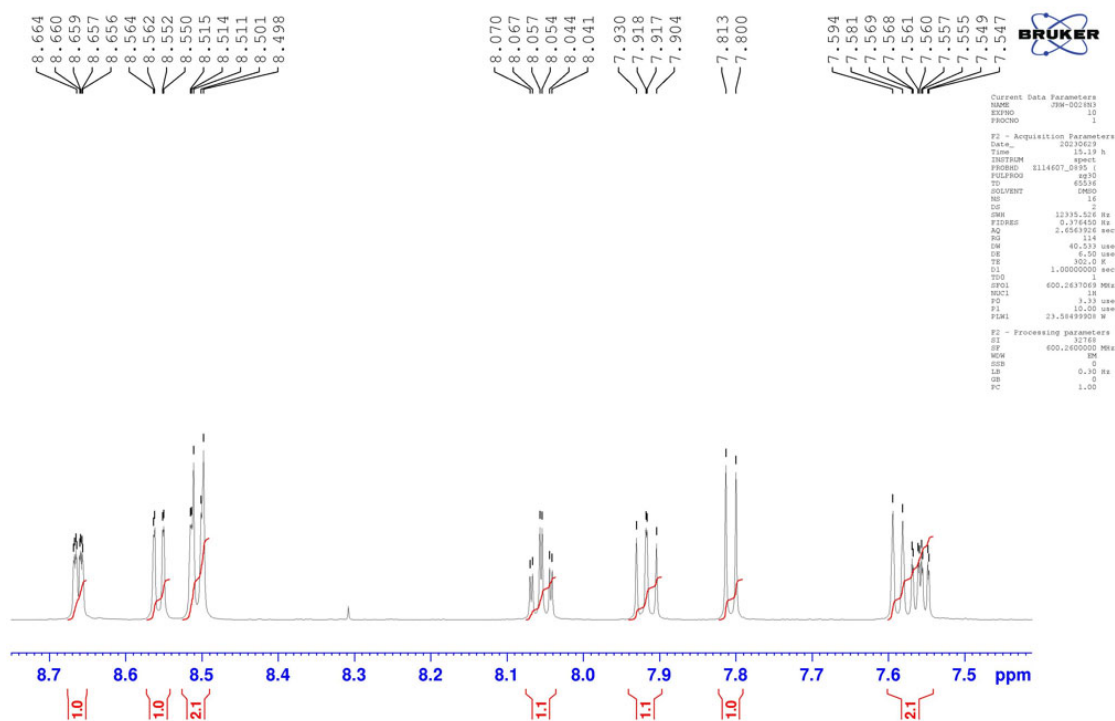

Figure S5.  $^1\text{H}$ -NMR spectra of NAP-Py- $\text{N}_3$

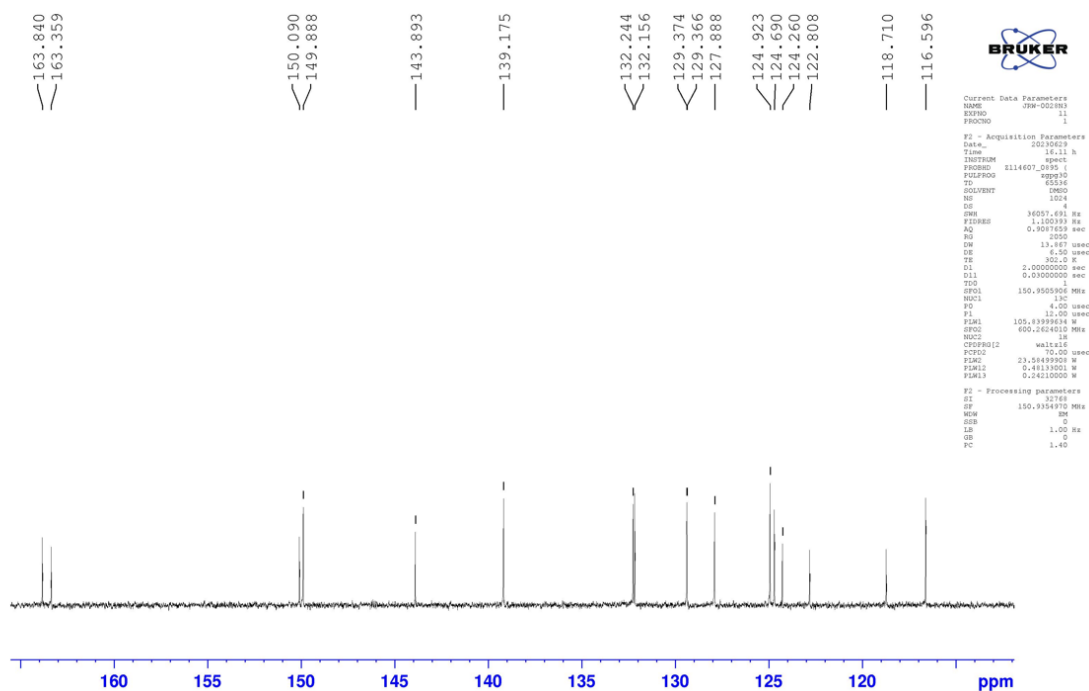

Figure S6.  $^{13}\text{C}$ -NMR spectra of NAP-Py- $\text{N}_3$

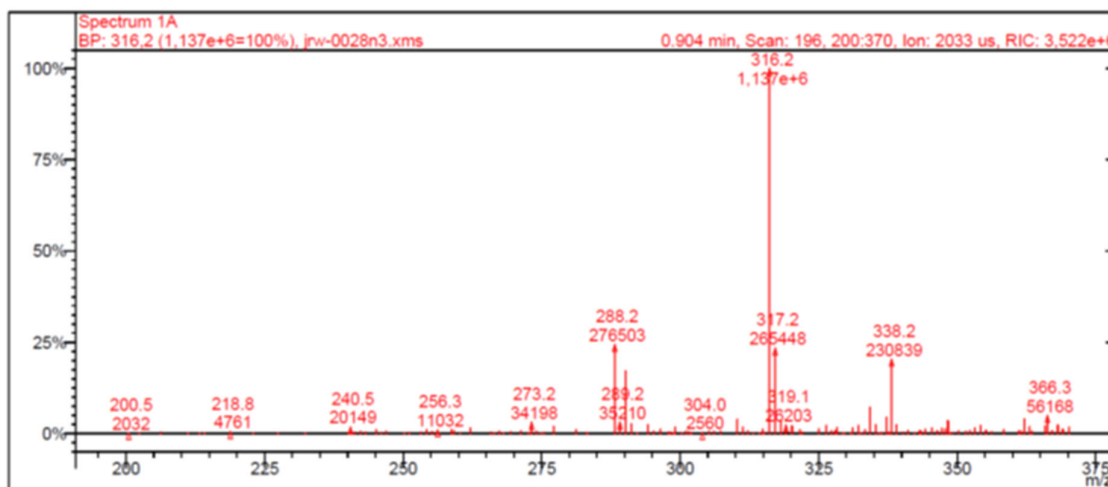

Figure S7. ESI-MS spectra of NAP-Py- $\text{N}_3$

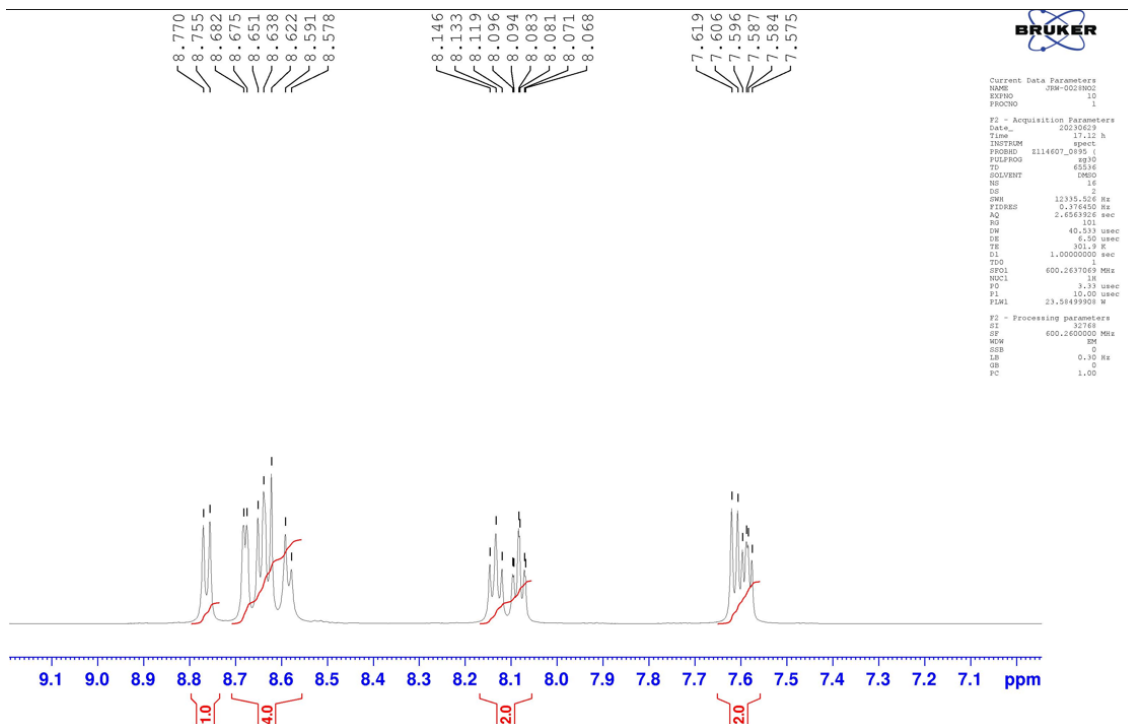

Figure S8.  $^1\text{H}$ -NMR spectra of NAP-Py- $\text{NO}_2$

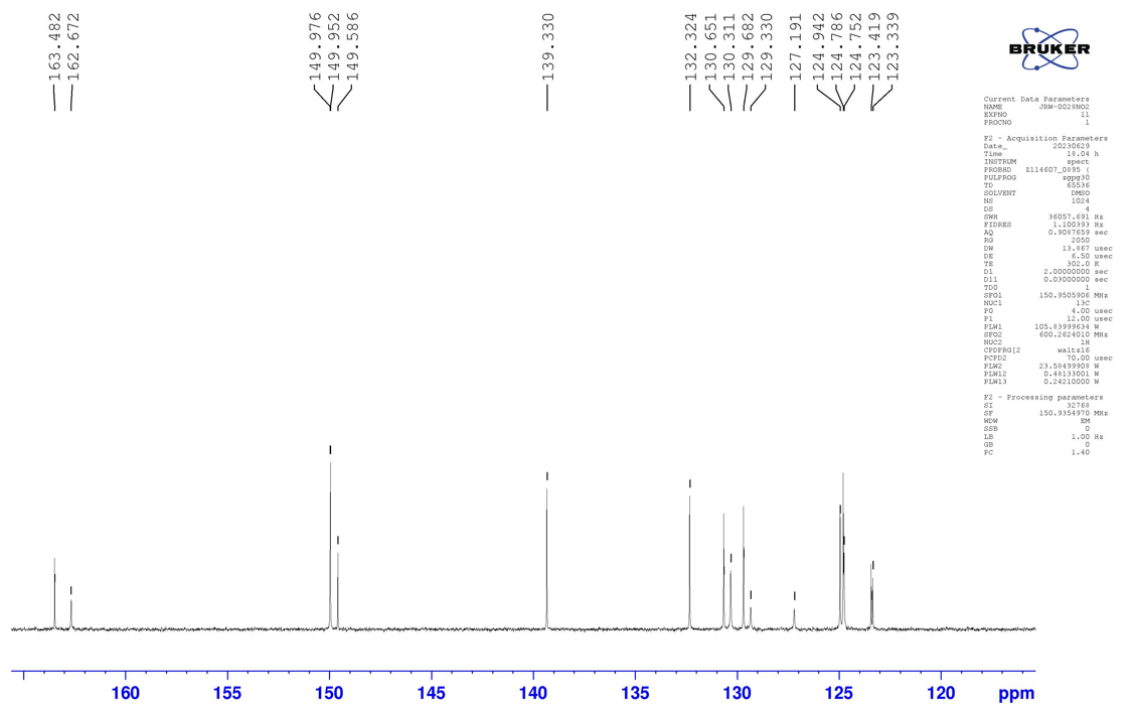

Figure S9.  $^{13}\text{C}$ -NMR spectra of NAP-Py- $\text{NO}_2$

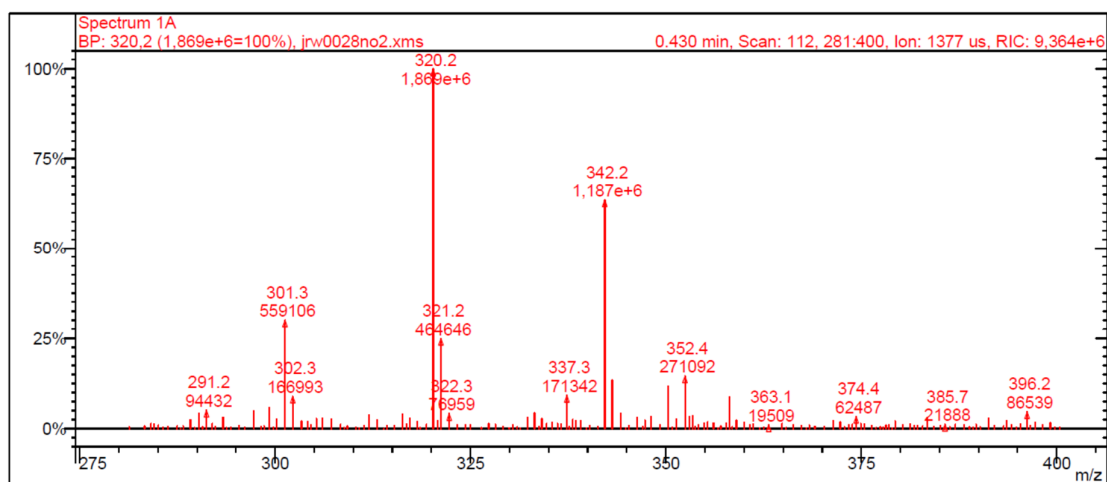

Figure S10. ESI-MS spectra of NAP-Py-NO<sub>2</sub>

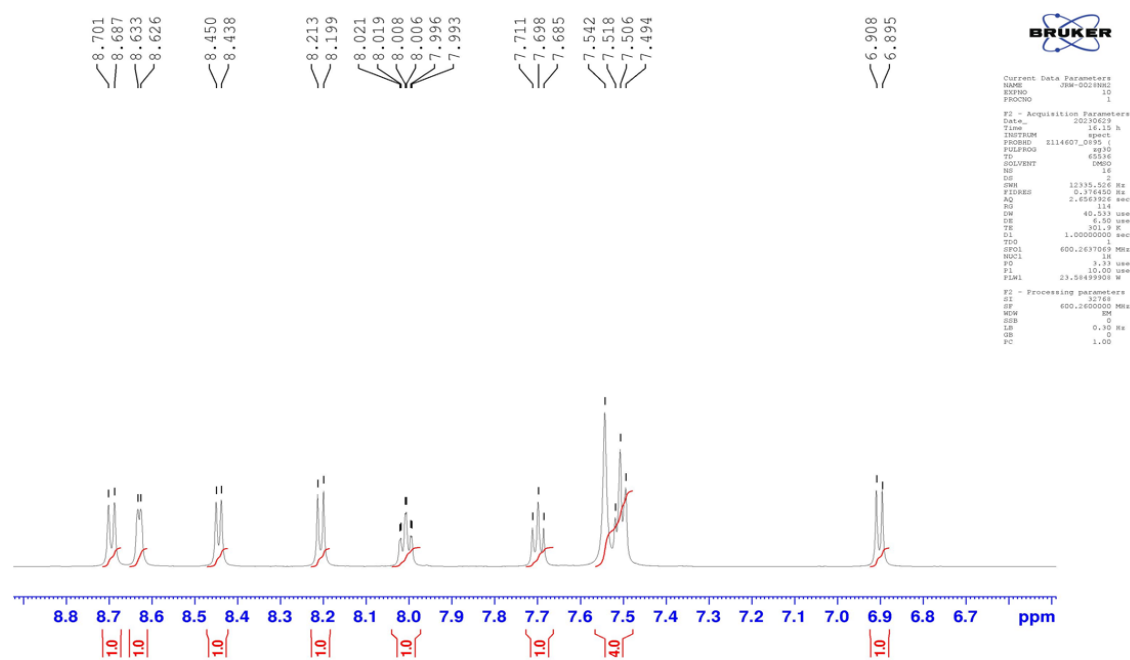

Figure S11. <sup>1</sup>H-NMR spectra of NAP-Py-NH<sub>2</sub>



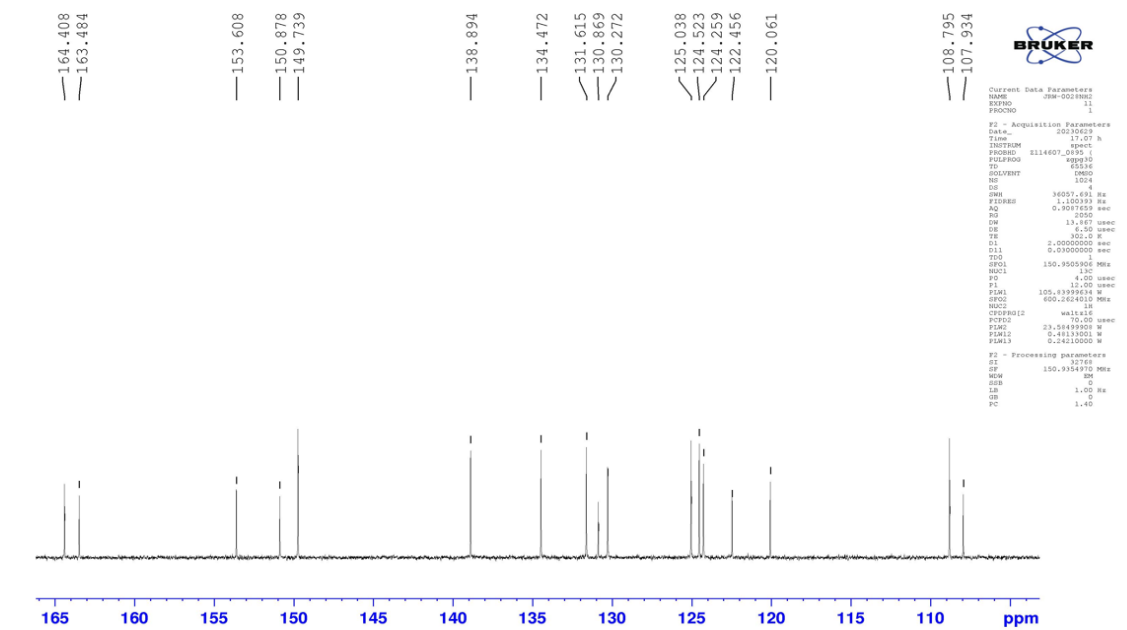

**Figure S12.**  $^{13}\text{C}$ -NMR spectra of NAP-Py-NH<sub>2</sub>

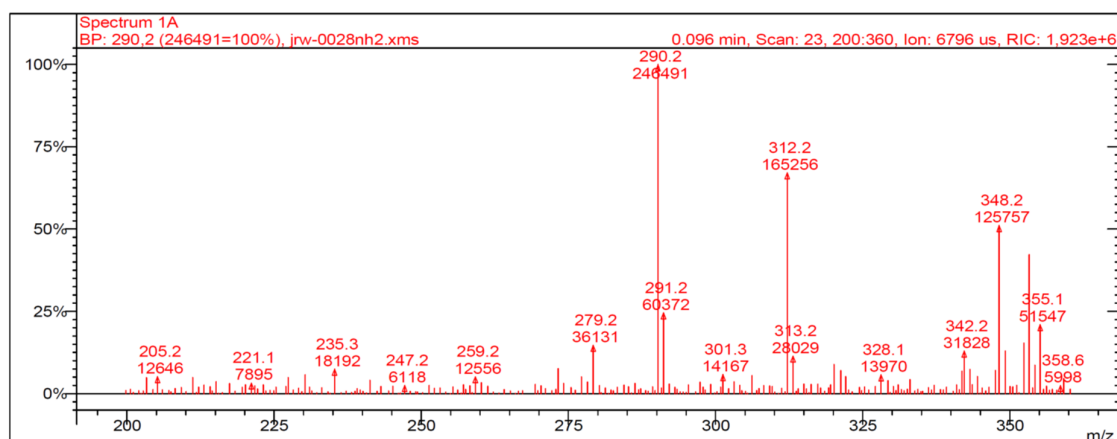

**Figure S13.** ESI-MS spectra of NAP-Py-NH<sub>2</sub>

S1. Sun, Y.; Li, C.; Feng, X.; Wang, C.; Wang, N.; Zhu, J.; Wang, T.; Cui, X. Si-coumarin-based fluorescent probes for ultrafast monitoring H<sub>2</sub>S in vivo. *Dyes and Pigments* **2021**, *186*, 109059.

S2. Ma, C.; Wei, C.; Li, X.; Zheng, X.; Chen, B.; Wang, M.; Zhang, P.; Li, X. A mitochondria-targeted dual-reactable fluorescent probe for fast detection of H<sub>2</sub>S in living cells. *Dyes and Pigments* **2019**, *162*, 624-631.

S3. Zhang, L.; Li, S.; Hong, M.; Xu, Y.; Wang, S.; Liu, Y.; Qian, Y.; Zhao, J. A colorimetric and ratiometric fluorescent probe for the imaging of endogenous hydrogen sulphide in living cells and sulphide determination in mouse hippocampus. *Org. Biomol. Chem.* **2014**, *12*, 5115.

- S4. Wei, C.; Wang, R.; Wei, L.; Cheng, L.; Li, Z.; Xi, Z.; Yi, L. O-fluorination of aromatic azides yields improved azido-based fluorescent probes for hydrogen sulfide: synthesis, spectra, and bioimaging. *Chem. Asian J.* **2014**, *9*, 3586–3592.
- S5. Feng, W.; Mao, Z.; Liu, L.; Liu, Z. A ratiometric two-photon fluorescent probe for imaging hydrogen sulfide in Lysosomes. *Talanta* **2017**, *167*, 134-142.
- S6. Duan, Y.; Yang, X.; Zhong, Y.; Guo, Y.; Li, Z.; Li, H. A ratiometric fluorescent probe for gasotransmitter hydrogen sulfide based on a coumarin-benzopyrylium platform. *Anal. Chim. Acta* **2015**, *859*, 59-65.
- S7. Hammers, M.; Taormina, M.; Cerda, M.; Montoya, L.; Seidenkranz, D.; Parthasarathy, R.; Pluth, M. Bright. fluorescent probe for H<sub>2</sub>S enables analyte-responsive, 3D imaging in live zebrafishu light sheet fluorescence microscopy. *J. Am. Chem. Soc.* **2015**, *137*, 10216–10223.
- S8. Zhang, J.; Guo, W. A new fluorescent probe for gasotransmitter H<sub>2</sub>S: high sensitivity, excellent selectivity, and a significant fluorescence off–on response. *Chem. Commun.* **2014**, *50*, 4214-4217.
- S9. Fang, Q.; Xiong, H.; Yang, L.; Wang, B.; Song, X. An instantaneous fluorescent probe for detecting hydrogen sulfide in biological systems. *New J. Chem.* **2019**, *43*, 13594-13599.
